# Supplementary material
Source: Research Square preprint supplement (doi:10.21203/rs.3.rs-9517209/v1)
Supplement: Supplementary file 2 [file f4a8330eb075f183fbef1d6f.docx]

edge to the cervical point is 8.7 mm and thus the root length 11.8 mm.

**Table 2** Crown designs for the lateral incisor. **NoAt**: Control design without any attachment; **recV**: Ideal vertical rectangular attachment. **recVf**: Vertical rectangular attachment with excessive material at the base. **recVfs**: Vertical rectangular attachment with excessive material at the base and shifted; **bevC**: Beveled attachment in the center of the facial crown surface. **bevO**: Beveled attachment occlusally shifted. **bevG**: Beveled attachment shifted towards the gingival margin

| NoAt | No attachment |  | Facial-lingual view  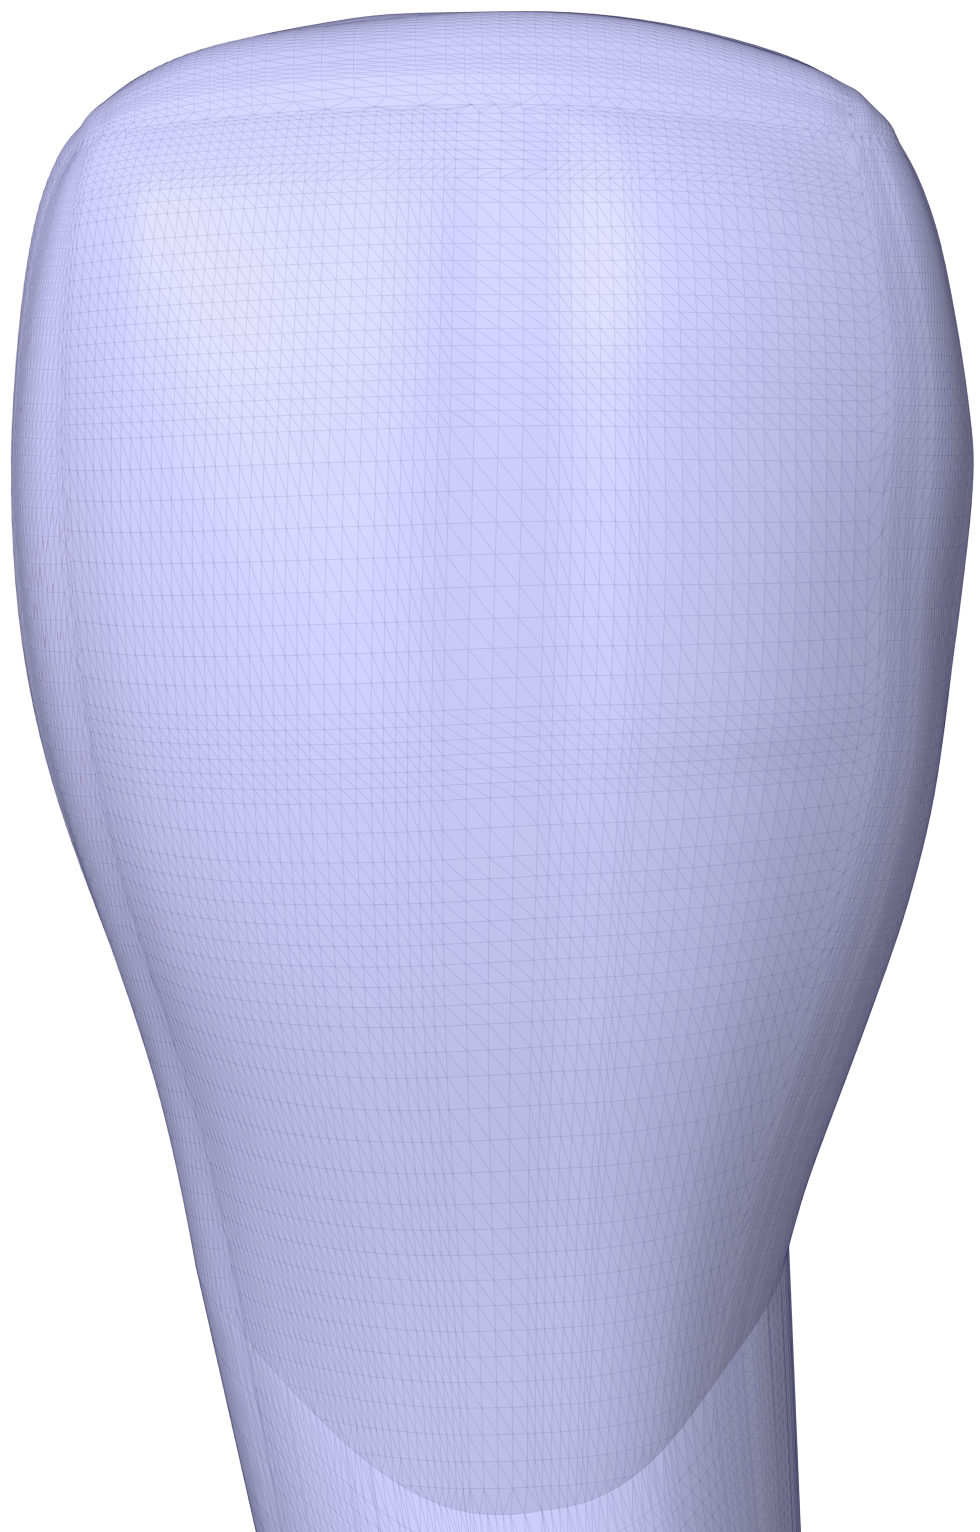 | Distal-mesial view  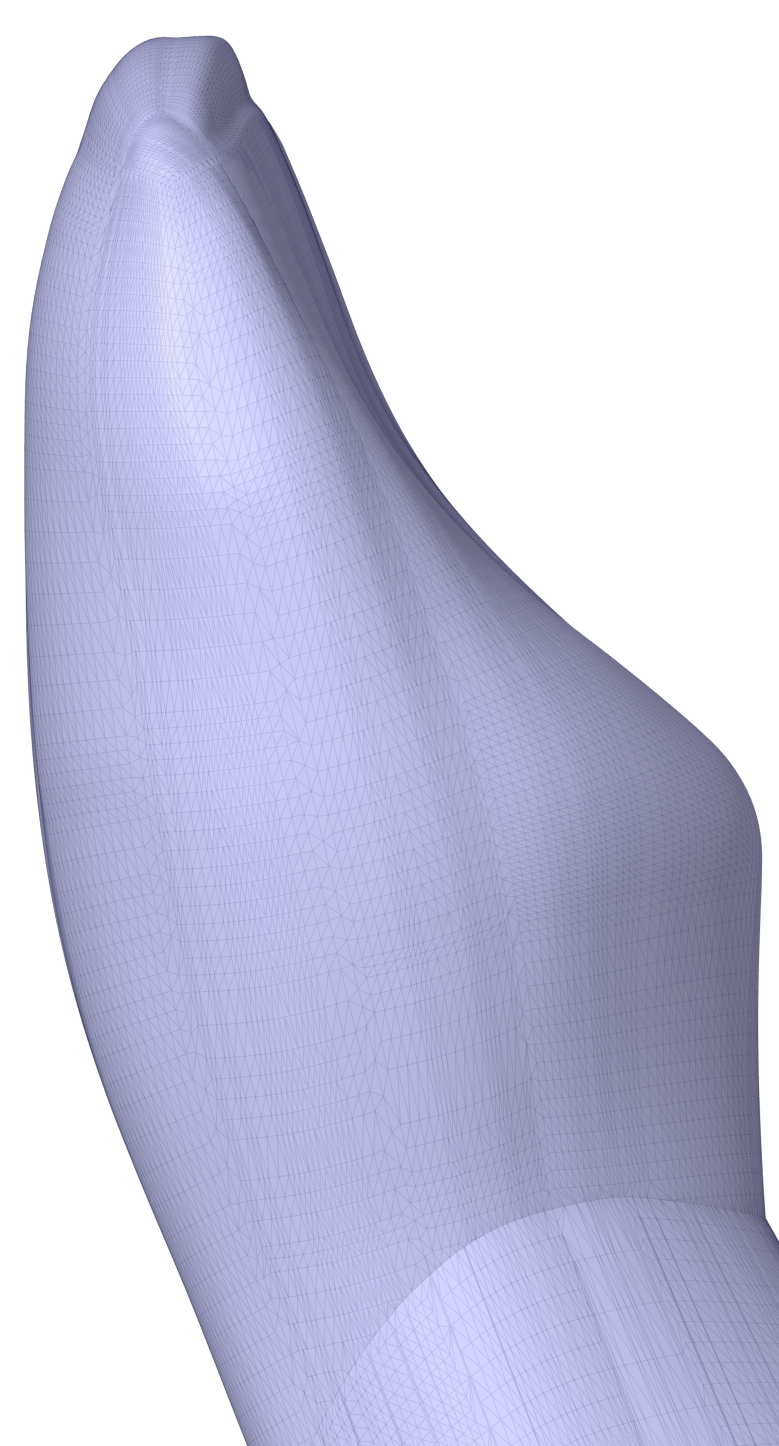 |
| --- | --- | --- | --- | --- |
| recV | Position | Center | 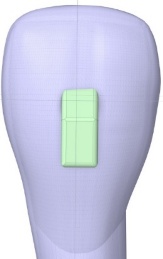  1.5 mm  3 mm | 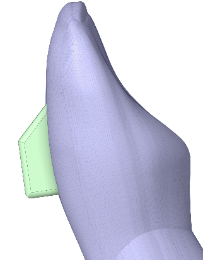  1 mm |
| Height | 3 mm |
| Depth | 1 mm |
| Width | 1.5 mm |
| Beveling angle | 45° |
| Edge blend radius | 0.2 mm |
| Disc radius | None |
| Disc depth | None |
| recVf | Position | Center | 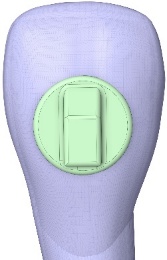  **+1 mm** | 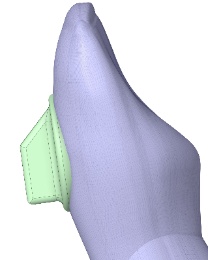  1.2…1.5 mm |
| Height | 3 mm |
| Depth | 1 mm |
| Width | 1.5 mm |
| Beveling angle | 45° |
| Edge blend radius | 0.2 mm |
| Disc radius | 2 mm |
| Disc depth | 0.3 mm |
| recVfs | Position | 1 mm shift to incisal edge | 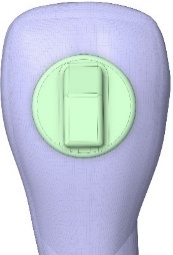 | 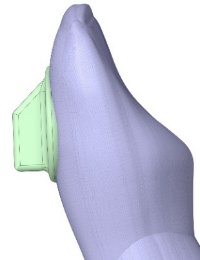 |
| Height | 3 mm |
| Depth | 1 mm |
| Width | 1.5 mm |
| Beveling angle | 45° |
| Edge blend radius | 0.2 mm |
| Disc radius | 2 mm |
| Disc depth | 0.3 mm |
| bevC | Position | Center | 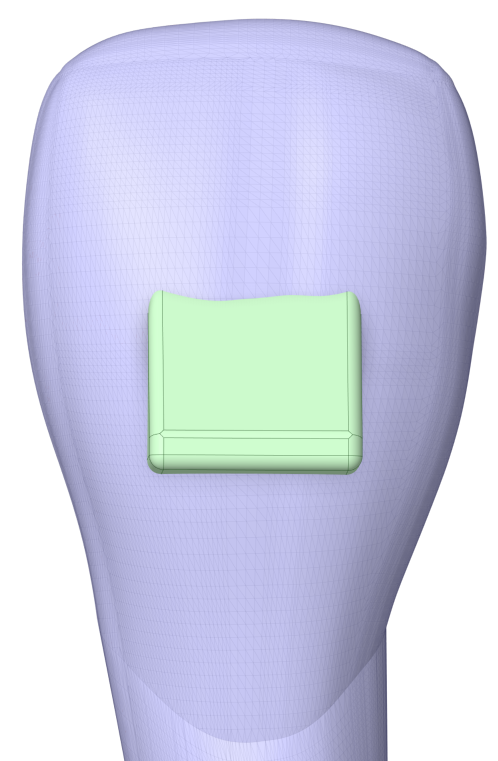 | 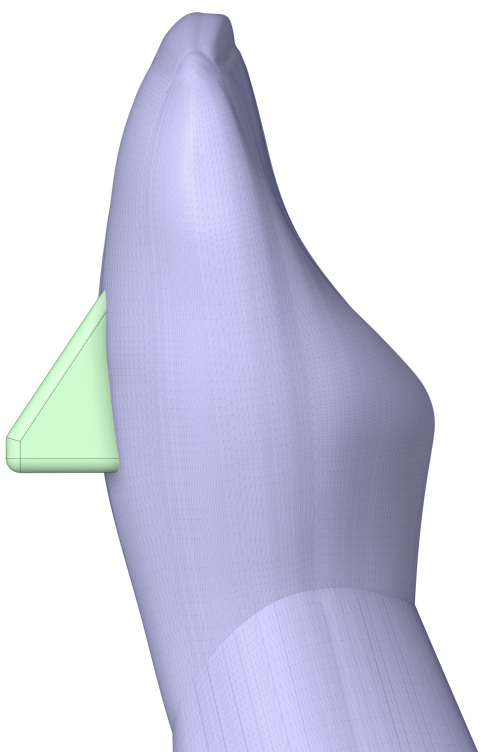 |
| Height | 2.5 mm |
| Depth | 1.5 mm |
| Width | 3.0 mm |
| Beveling angle | 33.69° |
| Edge blend radius | 0.2 mm |
| bevO | Position | 2 mm occlusal shift | 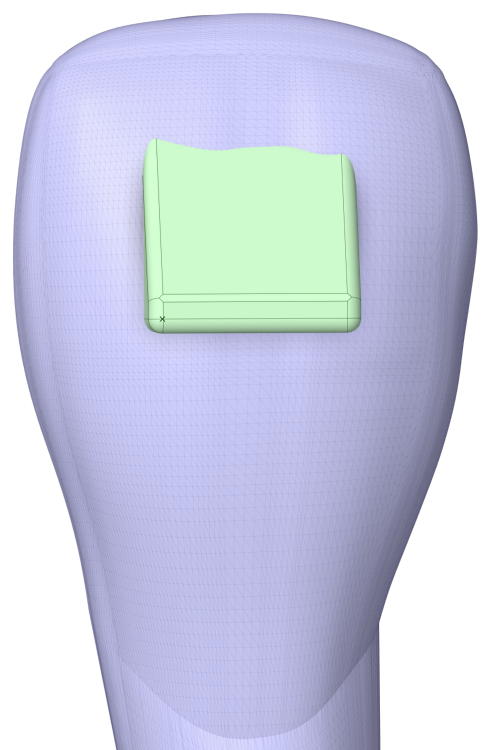  **+2 mm** | 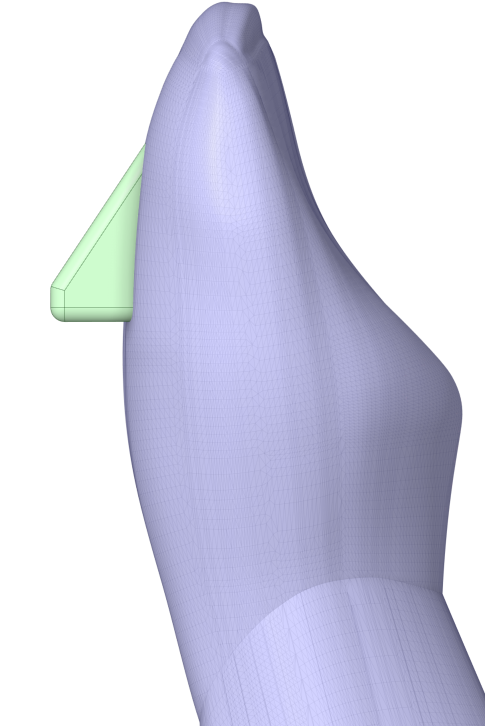 |
| Height | 2.5 mm |
| Depth | 1.5 mm |
| Width | 3.0 mm |
| Beveling angle | 33.69° |
| Edge blend radius | 0.2 mm |
| bevG | Position | 2 mm apical shift | 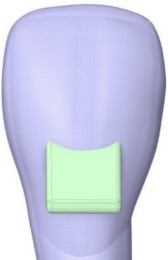  **-2 mm** | 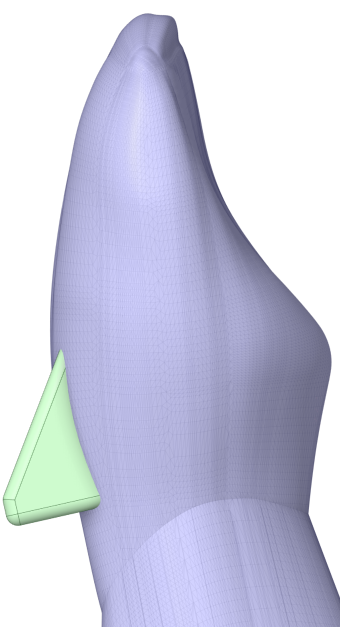 |
| Height | 2.5 mm |
| Depth | 1.5 mm |
| Width | 3.0 mm |
| Beveling angle | 33.69° |
| Edge blend radius | 0.2 mm |
